# Supplementary material for: Synthesis, optoelectronic properties of a dinuclear platinum(ii) complex containing a binary cyclometalated ligand in the single-emissive-layer PLEDs
Source: Royal Society of Chemistry journal article supplement (doi:10.1039/c2dt31863f), 2012-10-16

Synthesis, optoelectronic properties of a dinuclear platinum (II) complex  
containing a binary cyclometalated ligand in the single-emissive-layer  
PLEDs

Jian Luo, Yu Liu, Qing Chen, Danyan Shi, Ying Huang, Junting Yu, Yafei Wang\*,  
Zhiyong Zhang, Gangtie Lei, Weiguo Zhu\*

*College of Chemistry, Key Lab of Environment-Friendly Chemistry and Application  
in Ministry of Education, Xiangtan University, Xiangtan 411105, China*

Corresponding author: Dr. Weiguo Zhu and Dr. Yafei Wang

Tel: +86-731-58298280

Fax: +86-731-58292251

E-mail addresses: [zhuwg18@126.com](mailto:zhuwg18@126.com), [qiji830404@hotmail.com](mailto:qiji830404@hotmail.com)

## Electronic Supplementary Information

Figure S1. TGA thermograms of  $(dfppy-mhb-dfppy)Pt_2(acac)_2$  recorded at a heating rate of 20 °C/min

Figure S2. MALDI-TOF mass spectra of  $dfppy-mhb-dfppy$

Figure S3. MALDI-TOF mass spectra of  $(dfppy-mhb-dfppy)Pt_2(acac)_2$

**Figure S1.**

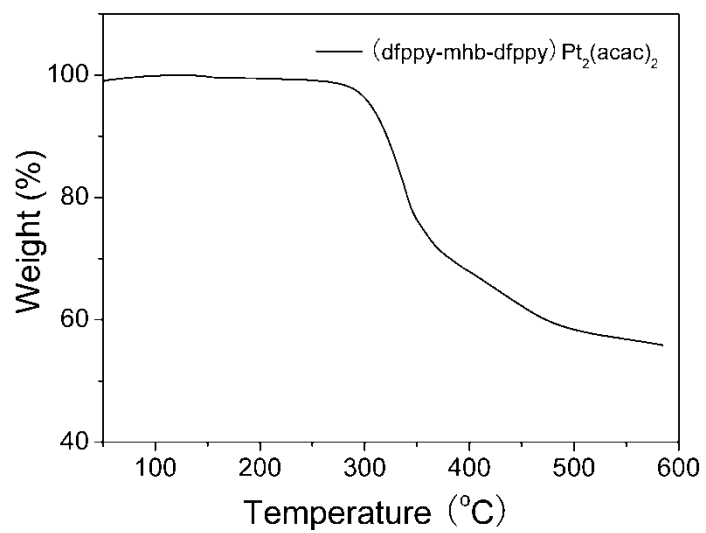

**Figure S2.**

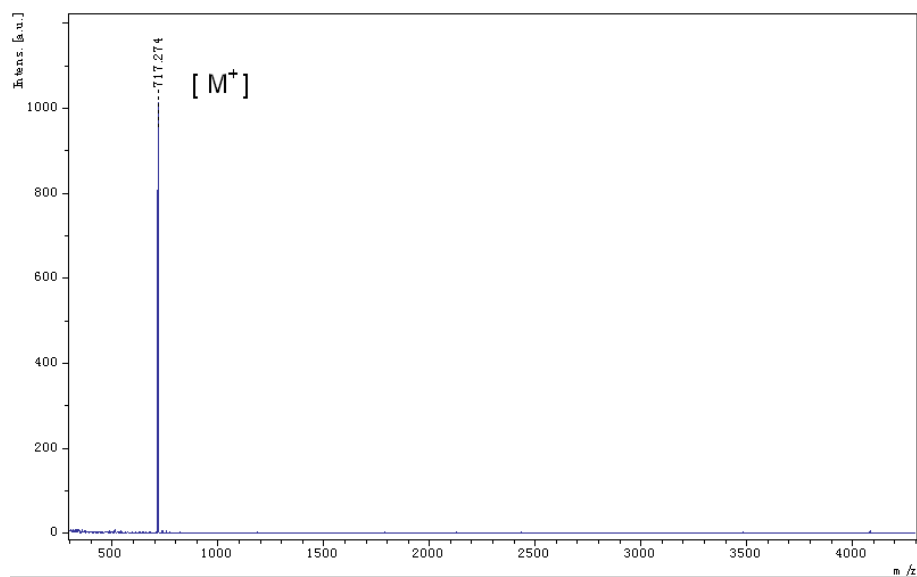

**Figure S3.**

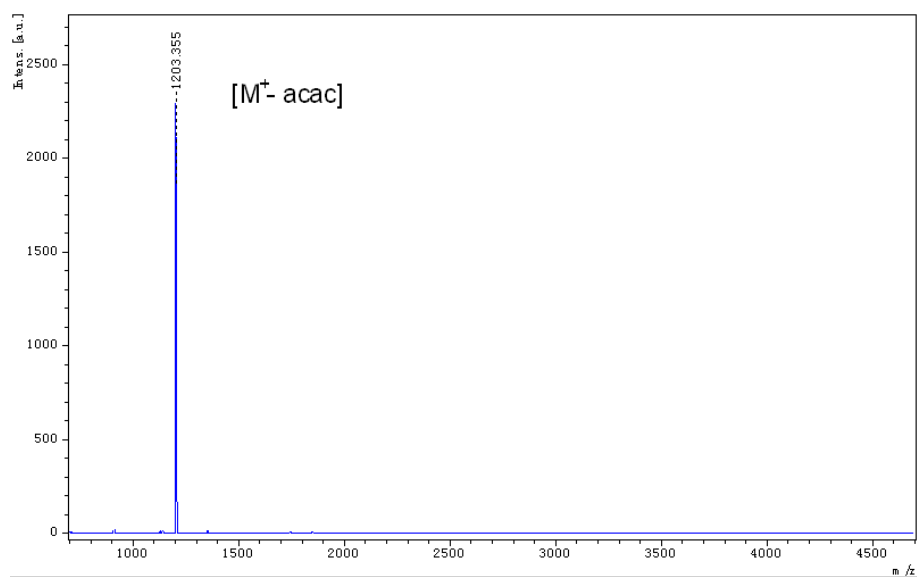

Supplement: c2dt31863f.pdf [file c2dt31863f.pdf]
